# Supplementary material
Source: PubMed Central journal article supplement (PMC9579024)
Supplement: mmc1.pdf [file mmc1.pdf]

iScience, Volume 25

## **Supplemental information**

### **Chemical screen uncovers novel structural classes of inhibitors of the papain-like protease of coronaviruses**

**Kwiwan Jeong, Jinhee Kim, JuOae Chang, Subin Hong, Inseo Kim, Sunghyun Oh, Sangeun Jeon, Joo Chan Lee, Hyun-Ju Park, Seungtaek Kim, and Wonsik Lee**

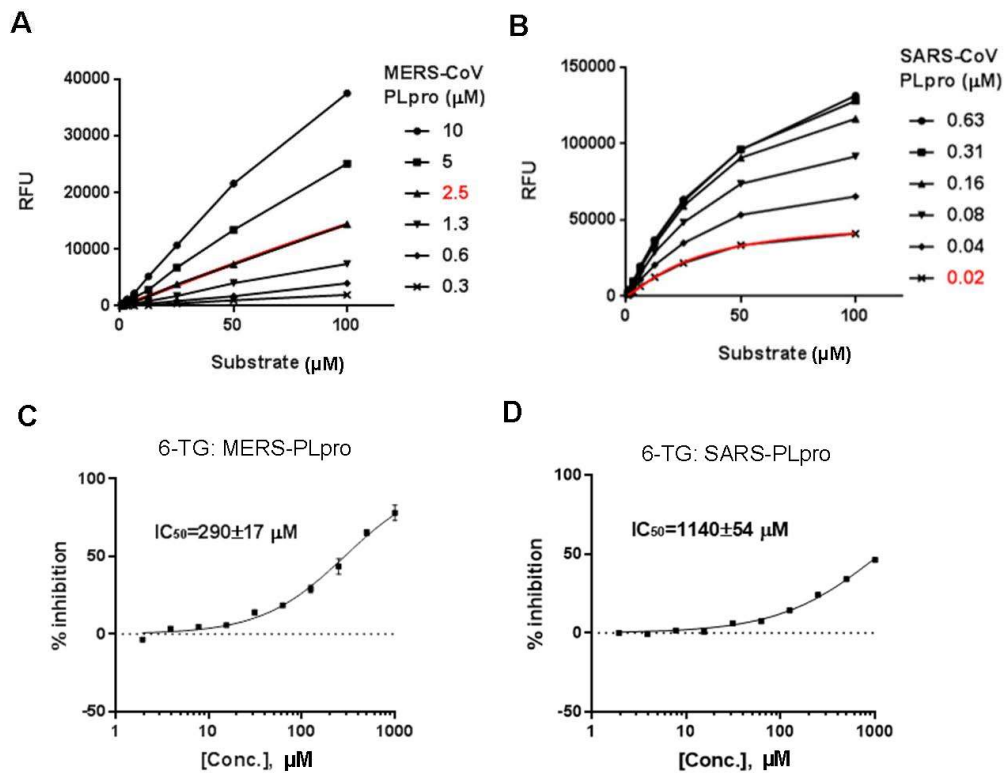

**Figure S1. Optimization of fluorescence-based PLpro protease assay (related to Figure 1 and Figure 3).** (A, B) Identification of optimal substrate and MERS-PLpro (A) and SARS-PLpro (B) enzyme concentrations for screening at room temperature. (C, D) Validation of selected substrate and enzyme concentrations using a known PLpro inhibitor 6-TG on MERS-PLpro (C) and SARS-PLpro (D). Each data point represents the mean of duplicate assays with  $\pm\text{SEM}$ .

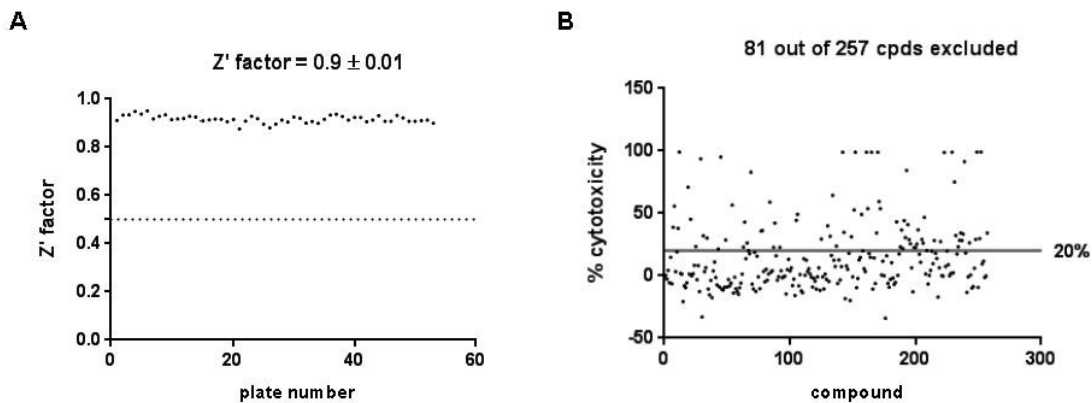

**Figure S2. Z' factor of the compound screen and exclusion of cytotoxic compounds (related to Figure 1).**

**(A)** Z'-factors of 60 assay plates. Average Z'-factor of 60 assay plates was calculated to be  $0.91 \pm 0.01$ . **(B)** Cytotoxicity profile of primary hits. A total of 81 compounds from 257 primary hits were excluded by the cytotoxicity test.

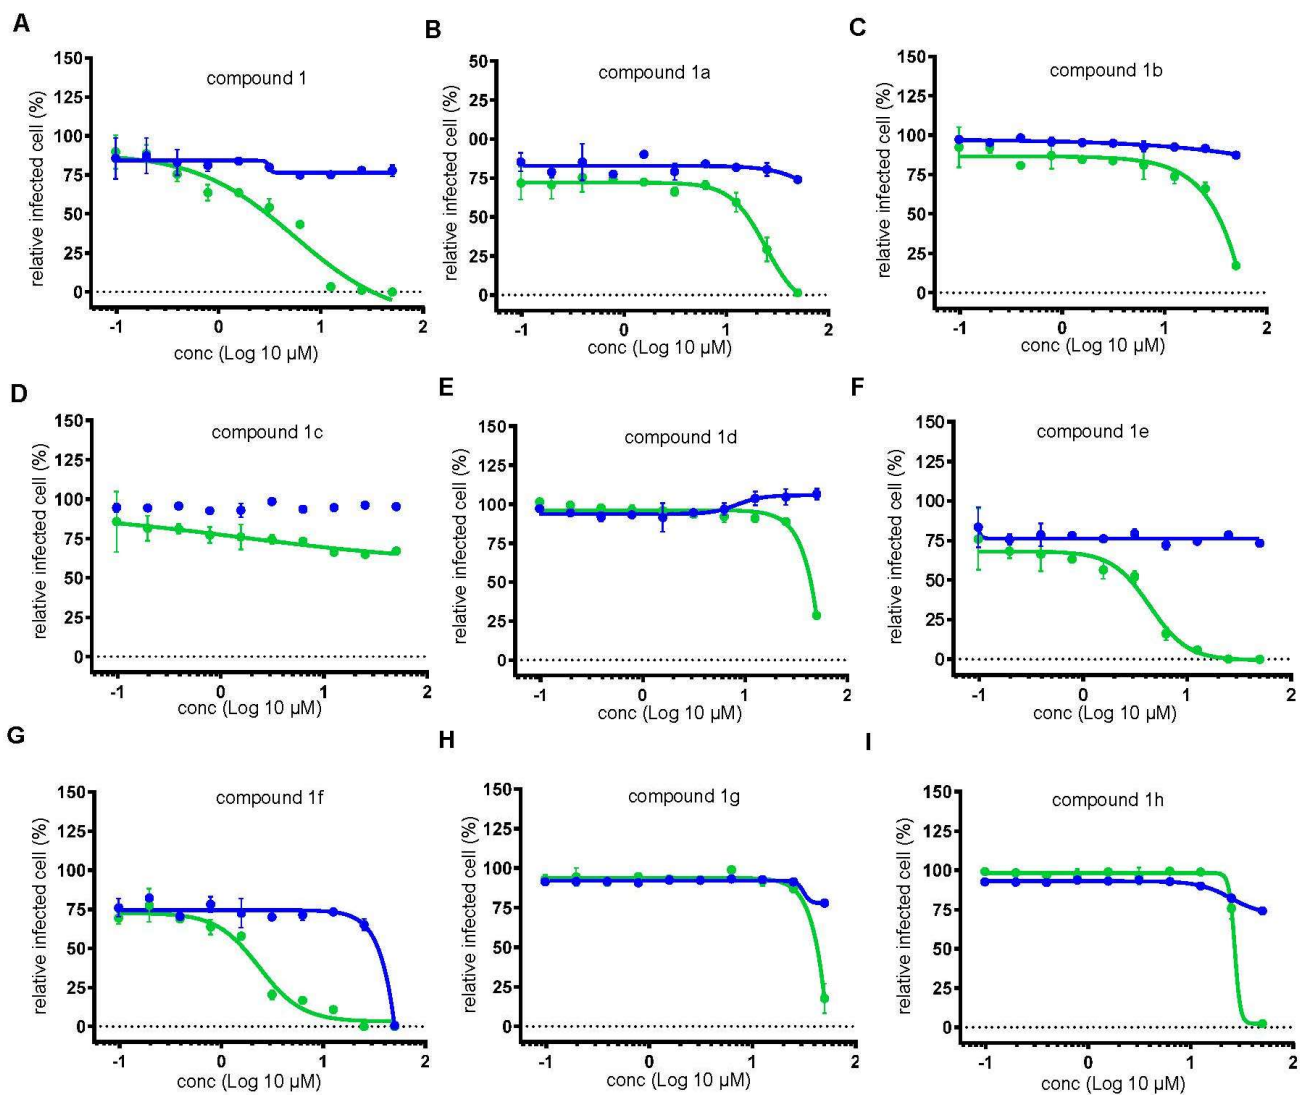

**Figure S3. Efficacy measurement of thiophenes (compound 1) against MERS-CoV using immunofluorescence-based infection assay in cell model (related to Figure 3).**

Efficacy and cytotoxicity measurements of **1** (A) and its analogs (B-I). Green dots represent relative infection rate, while blue dots represent relative cytotoxicity at various compound concentrations. Each data point represents the mean of duplicate assays with  $\pm$ SD.

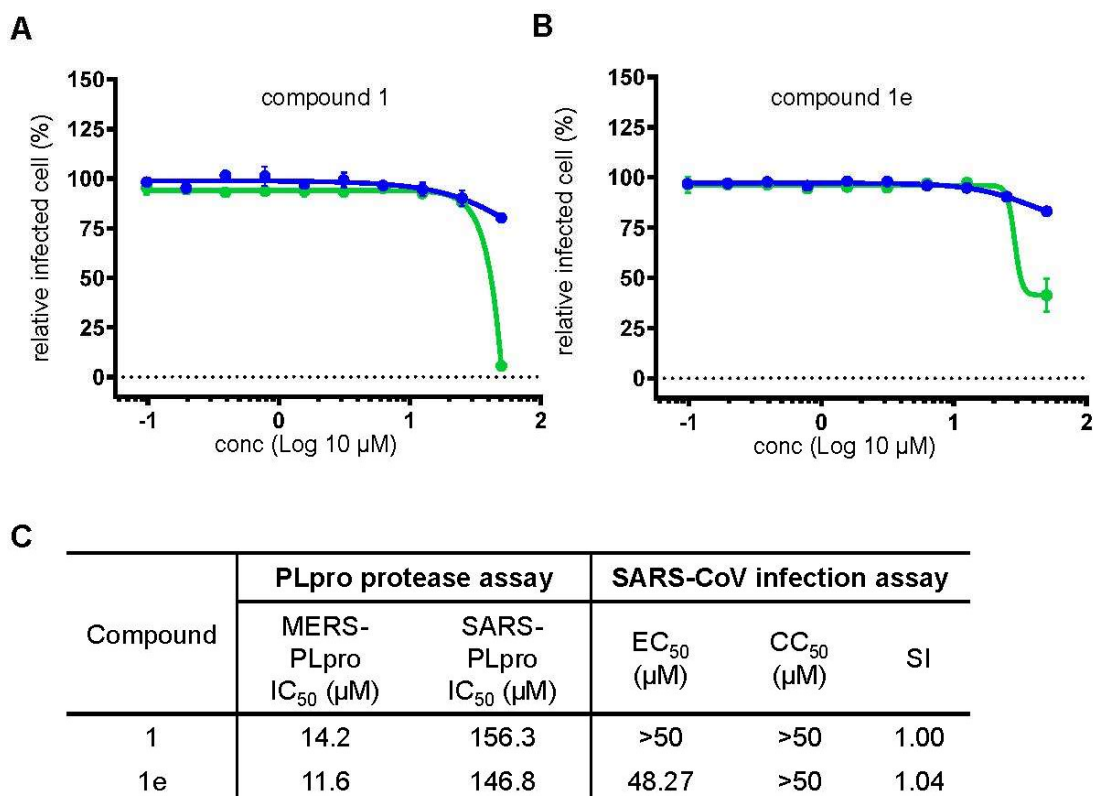

**Figure S4. Efficacy measurement of compound 1 and 1e in SARS-CoV infection cell model (related to Figure 3).**

(A, B) Efficacy measurement of compound 1 (A) and 1e (B) against SARS-CoV infection using immunofluorescence-based infection assay in cell model. Green and blue curve show efficacy and toxicity, respectively. Each data point represents the mean of duplicate assays with  $\pm$ SD. (C) Calculation of IC<sub>50</sub> and EC<sub>50</sub>. IC<sub>50</sub> values were calculated from data generated by *in vitro* PLpro protease assay, while EC<sub>50</sub>, CC<sub>50</sub>, and SI were calculated from the data obtained by immunofluorescence-based infection assay.

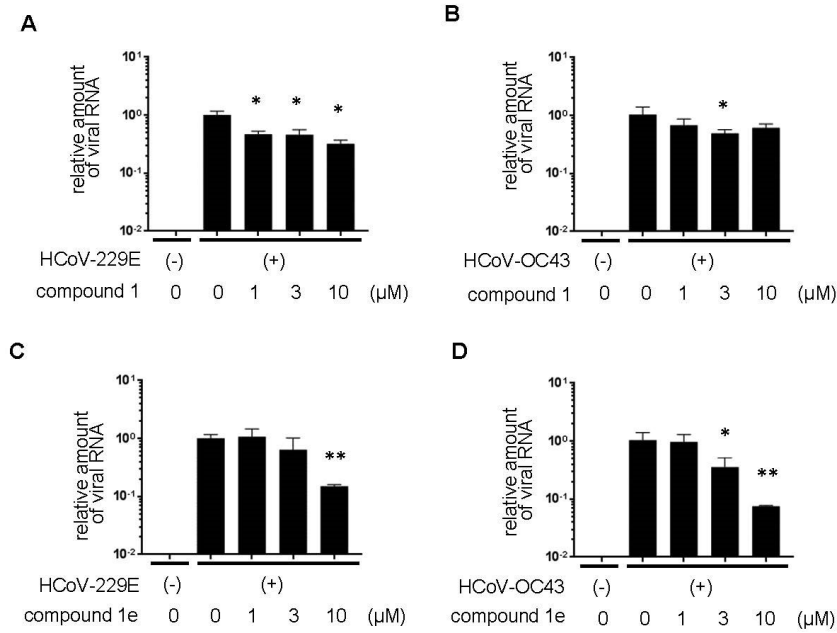

**Figure S5. Efficacy measurement of compound 1 and 1e against HCoV-229E or HCoV-OC43 infection in cell model (related to Figure 3).**

**(A, B)** Efficacy of compound 1 against HCoV-229E **(A)** and HCoV-OC43 **(B)** infection measured by quantification of viral RNA. **(C, D)** Efficacy of compound 1e against HCoV-229E **(C)** and HCoV-OC43 **(D)** infection measured by quantification of viral RNA. Each data point represents the mean of duplicate assays with  $\pm$ SEM. \* $p < 0.5$ , \*\* $p < 0.01$ , \*\*\* $p < 0.001$  compared to no compound (0  $\mu$ M) control by Student's *t*-test.

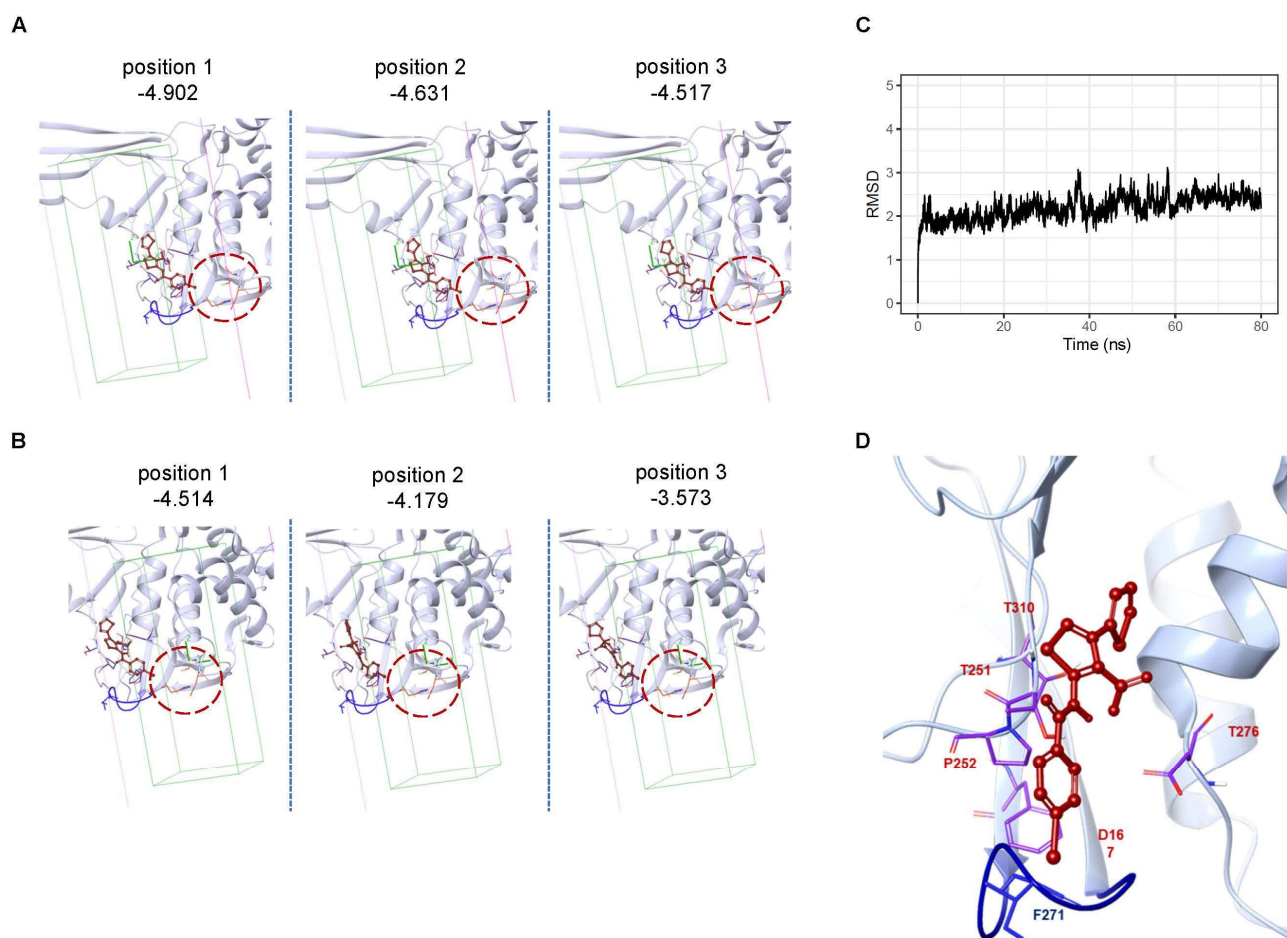

**Figure S6. Determination of top 3 binding poses upon docking compound 1 to MERS-PLpro using different residues as a center (related to Figure 3).**

(A, B) Top 3 binding poses generated by docking compound 1 to MERS-PLpro with T251 of the region near BL2 loop as a center (A) or C112 of the catalytic site as a center (B). Results demonstrate that compound 1 does not bind to the catalytic site even when the docking was performed with the catalytic site as a center. The catalytic site is marked by a red circle. The numbers represent the binding score of each pose. (C, D) Result of molecular dynamics simulation (MDS) performed with MERS-PLpro and compound 1 using Cresset's Flare 6.0.1. MDS was performed for 80 ns. Root mean square deviation (RMSD) during the MDS was plotted (C) and docking pose at 80 ns was presented (D).

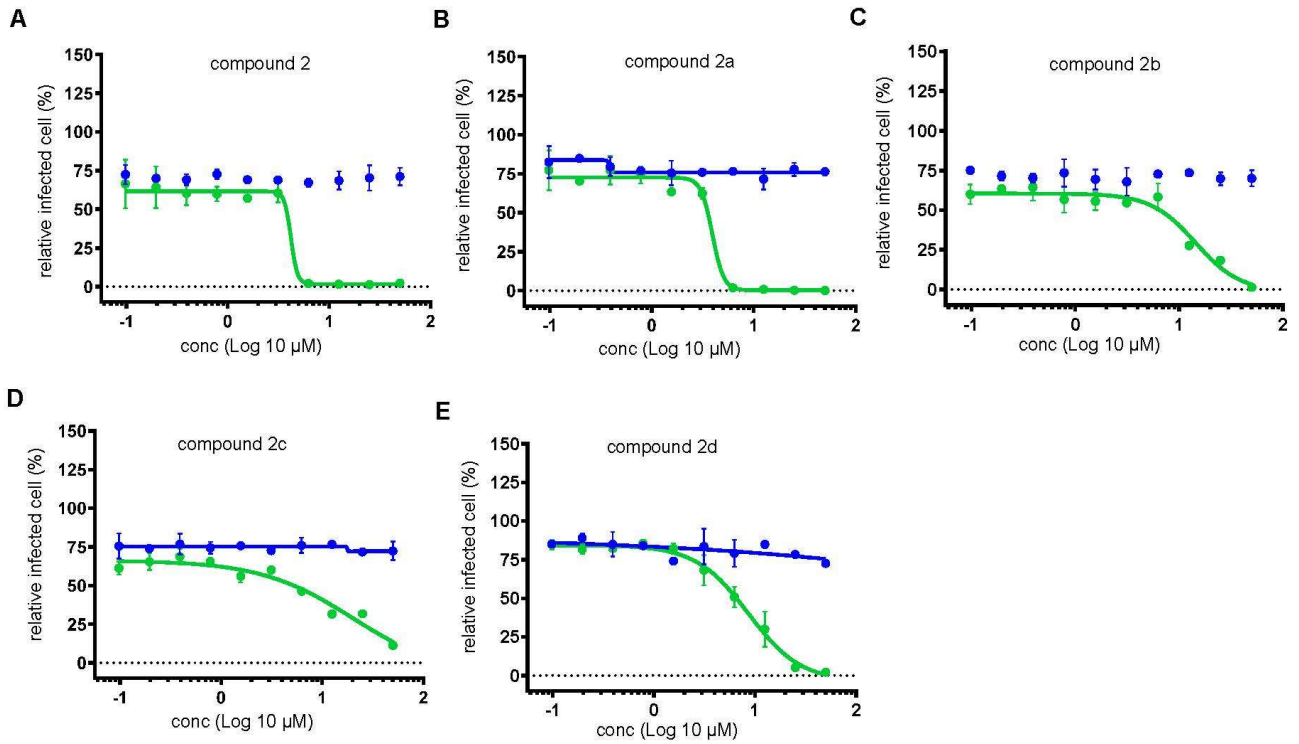

**Figure S7. Efficacy measurement of furans (compound 2) against MERS-CoV infection using infection assay in cell model (related to Figure 4).**

Efficacy and cytotoxicity measurements of **2** (A) and its analogs (B-E). Green dots represent relative infection rate, while blue dots represent relative cytotoxicity at various compound concentrations. Each data point represents the mean of duplicate assays with  $\pm\text{SD}$ .



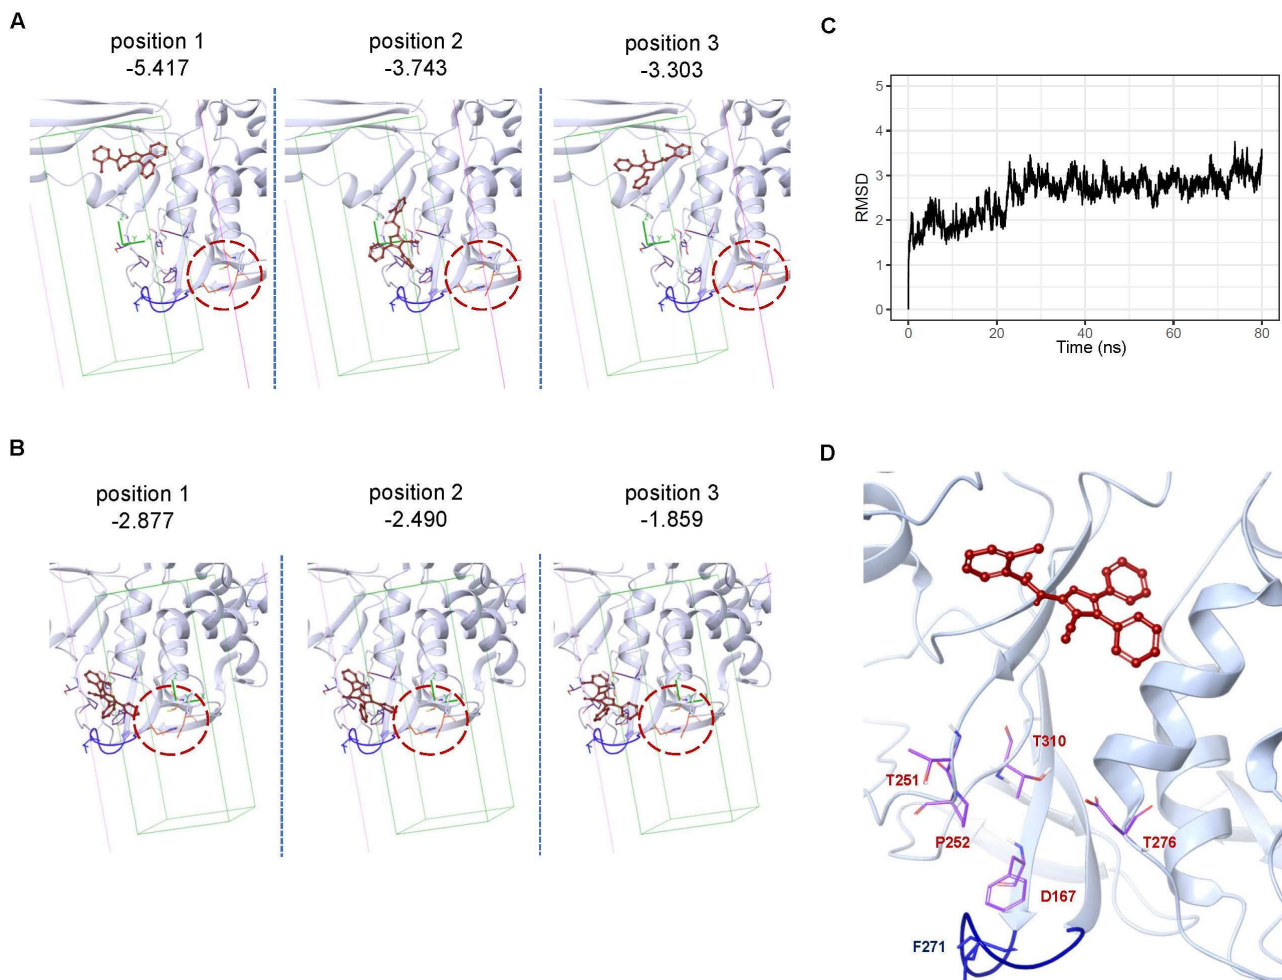

**Figure S8. Determination of top 3 binding poses upon docking compound 2 to MERS-PLpro (related to Figure 4).**

(**A**, **B**) Top 3 binding poses generated by docking compound 2 to MERS-PLpro with T251 of the region near BL2 loop as a center (**A**) or C112 of the catalytic site as a center (**B**). Results demonstrate that compound 2 does not bind to the catalytic site even when the docking was performed with the catalytic site as a center. The catalytic site is marked by a red circle. The numbers represent the binding score of each pose. (**C**, **D**) Results of MDS (molecular dynamics simulation) performed with MERS-PLpro and compound 2 for 80 ns using Cresset's Flare 6.0.1. The profile of RMSD (root mean square deviation) during MDS was plotted (**C**) and the docking pose at 80 ns was presented (**D**).

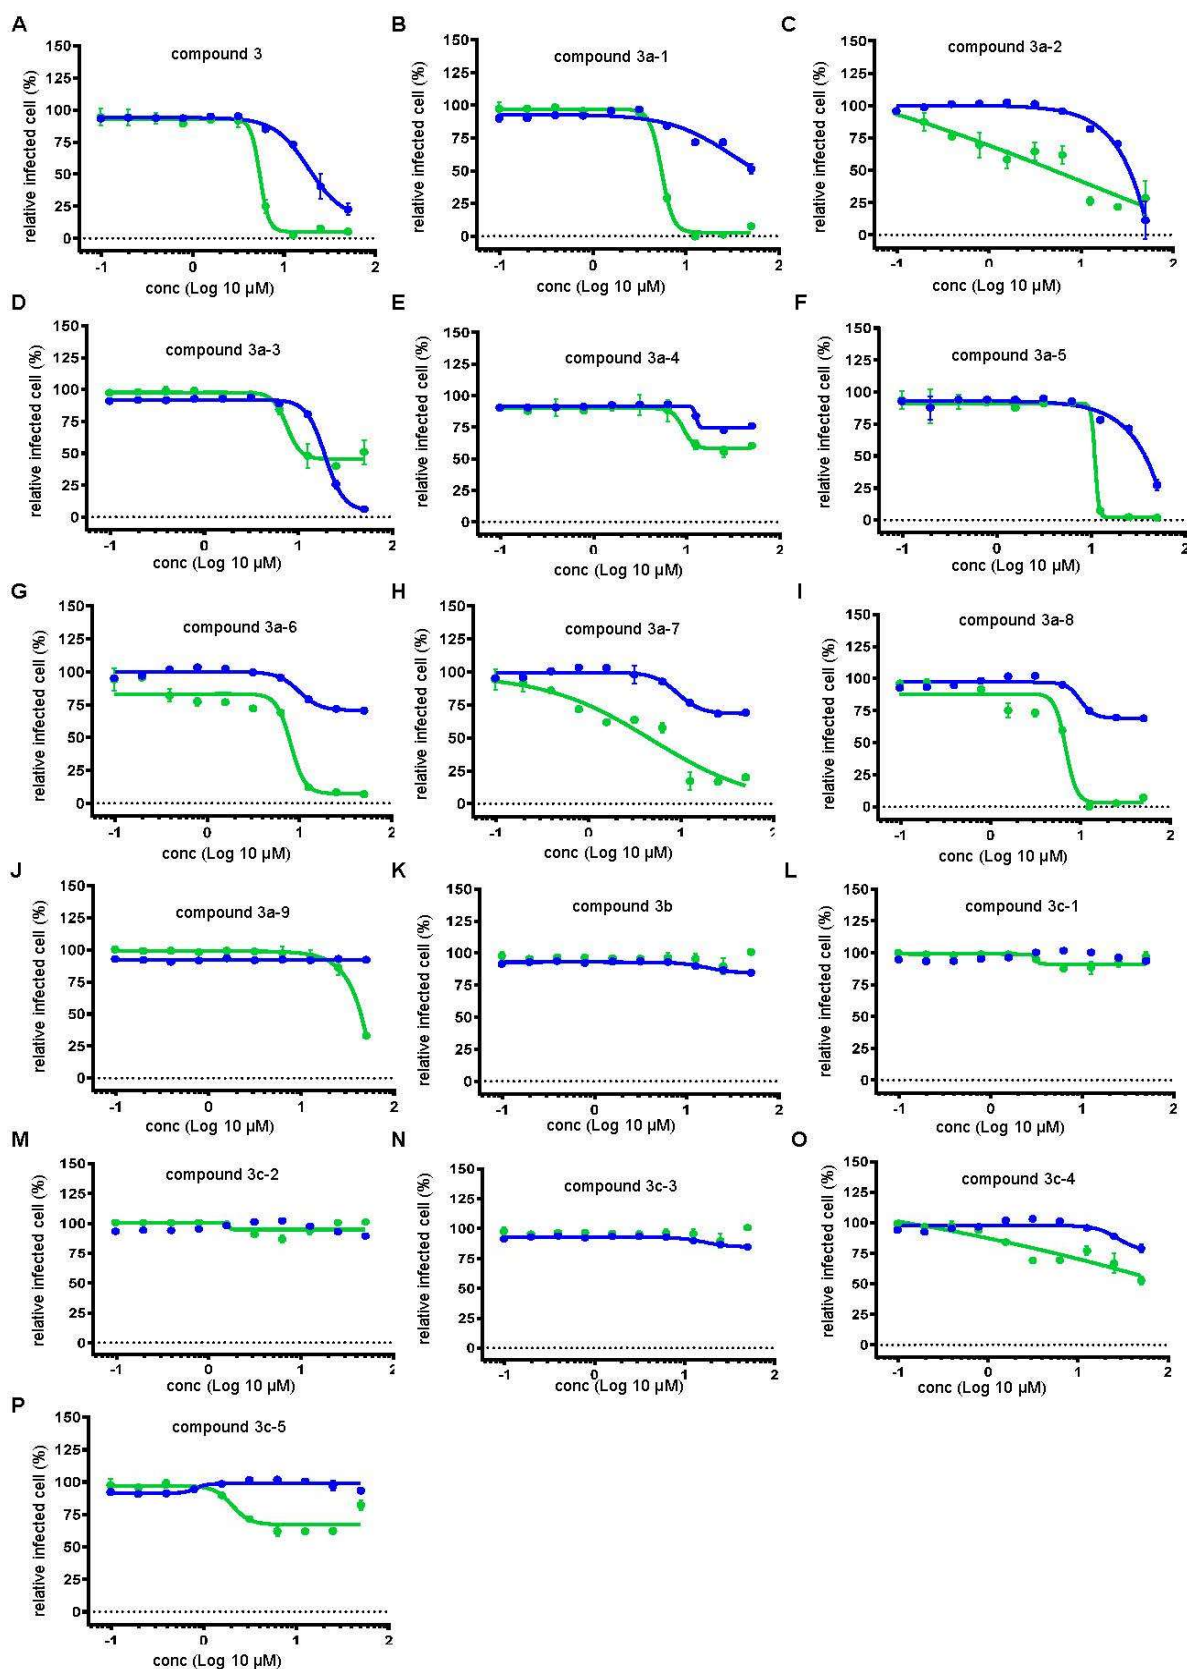

**Figure S9. Efficacy measurement of triazoloquinazolines (compound 3) against MERS-CoV infection using immunofluorescence-based infection assay in cell model (related to Figure 5).**

Efficacy and cytotoxicity measurements of **3** (A) and its analogs (B-P). Green dots represent relative infection rate, while blue dots represent relative cytotoxicity at various compound concentrations. Each data point represents the mean of duplicate assays with  $\pm$ SD.

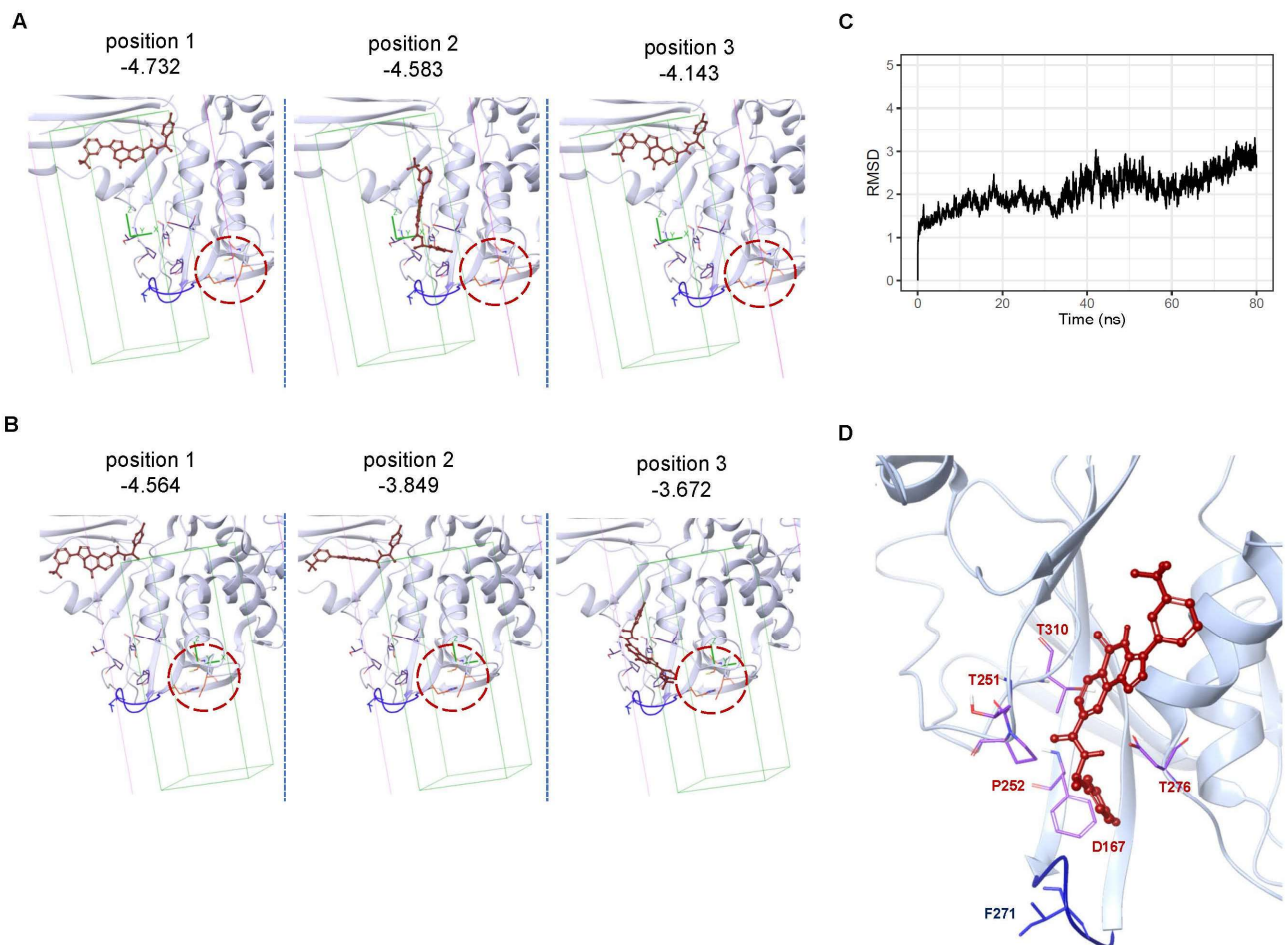

**Figure S10. Determination of top 3 binding poses upon docking compound 3 to MERS-PLpro (related to Figure 5).**

(**A**, **B**) Top 3 binding poses generated by docking of compound **3** to MERS-PLpro with T251 of the region near BL2 loop as a center (**A**) or C112 of the catalytic site as a center (**B**). Results demonstrate that compound **3** does not bind to the catalytic site. The catalytic site is marked by a red circle. The numbers represent the binding score of each pose. (**C**, **D**) Results of MDS (molecular dynamics simulation) performed with MERS-PLpro and compound **3** for 80 ns using Cresset's Flare 6.0.1. (**C**) The RMSD (root mean square deviation) during MDS was calculated and plotted. (**D**) The docking pose of compound **3** at 80 ns was presented.

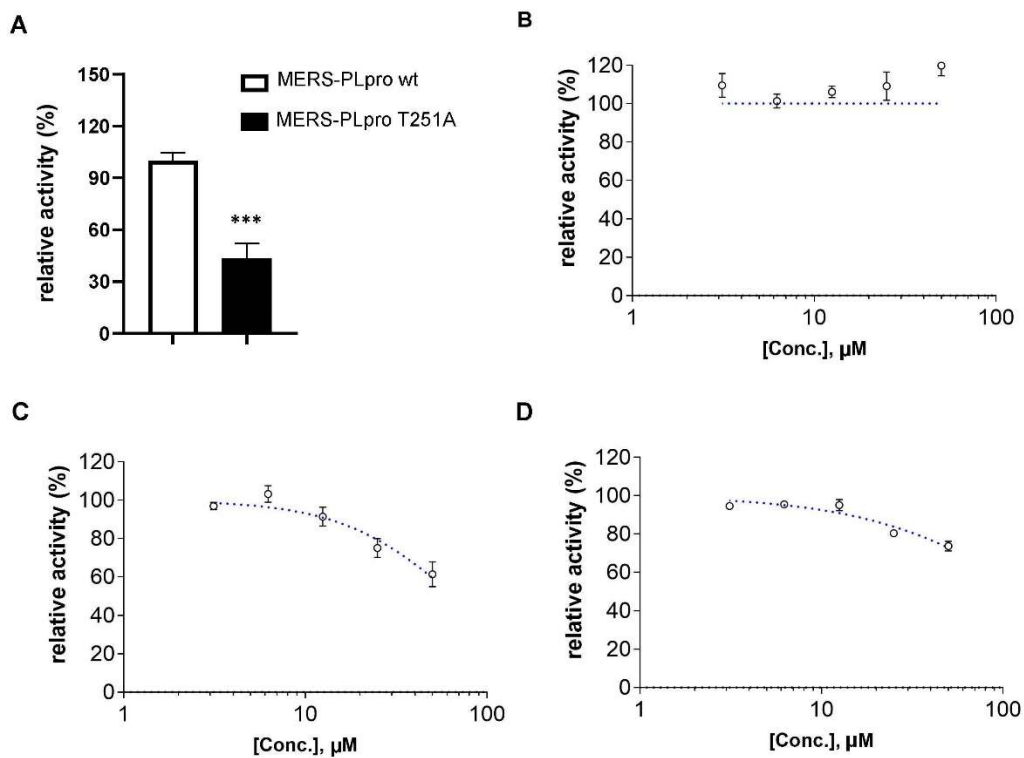

**Figure S11. Mutation in T251 residue of MERS-PLpro resulted in loss of enzyme activity and reactivity to thiophene (related to Figure 3, Figure 4, and Figure 5).**

(A) Enzyme activity of MERS-PLpro with mutation at T251 residue (MERS-PLpro T251A). Substitution of T251 with alanine resulted in a significant loss of its enzyme activity when compared with the wild-type control MERS-PLpro (MERS-PLpro wt). (B-D) Potency of compounds against MERS-PLpro T251A. Compounds **1** (B), compound **2** (C), and compound **3** (D) were tested at 0, 3.12, 6.25, 12.5, 25, and 50  $\mu\text{M}$  for their potency against MERS-PLpro T251A. Each data point represents the mean of triplicate assays with  $\pm\text{SEM}$ . \* $p < 0.05$ , \*\* $p < 0.01$ , \*\*\* $p < 0.001$  compared to wild-type MERS-PLpro by Student's  $t$ -test.

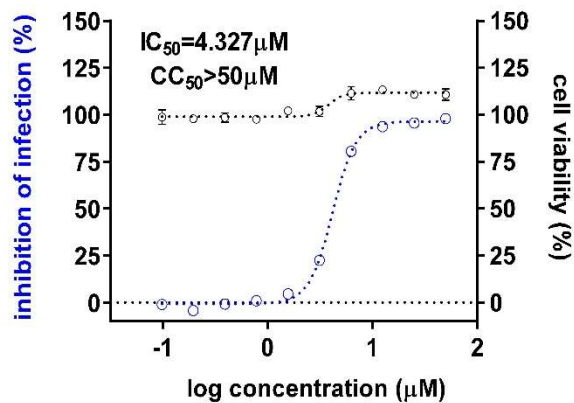

**Figure S12. Efficacy and cytotoxicity of remdesivir measured by virus infection assay (related to Figure 6).**

Ten different concentrations of remdesivir were tested by the immunofluorescence assay, and  $IC_{50}$  and cytotoxicity were calculated through curve fitting analysis using Prism 6. Each data point represents the mean of duplicate assays with  $\pm SD$ .

| Compound | Vendor ID           | Vendor         |
|----------|---------------------|----------------|
| <b>1</b> | Lead compound       | Screen library |
| 1a       | 7114072             | ChemBridge     |
| 1b       | 7119694             | ChemBridge     |
| 1c       | D304-0025           | ChemDiv        |
| 1d       | 5900099             | ChemBridge     |
| 1e       | 5889373             | ChemBridge     |
| 1f       | 7112485             | ChemBridge     |
| 1g       | MolPort-004-297-411 | MolPort        |
| 1h       | 5895218             | ChemBridge     |
| <b>2</b> | Lead compound       | Screen library |
| 2a       | 7744029             | ChemBridge     |
| 2b       | 7934758             | ChemBridge     |
| 2c       | 7937442             | ChemBridge     |
| 2d       | 7940498             | ChemBridge     |
| <b>3</b> | Lead compound       | Screen library |
| 3a-1     | E543-0745           | ChemDiv        |
| 3a-2     | E543-0755           | ChemDiv        |
| 3a-3     | E543-0737           | ChemDiv        |
| 3a-4     | E543-0773           | ChemDiv        |
| 3a-5     | E543-0740           | ChemDiv        |
| 3a-6     | E543-0733           | ChemDiv        |
| 3a-7     | E543-0763           | ChemDiv        |
| 3a-8     | E543-0766           | ChemDiv        |
| 3a-9     | C200-8702           | ChemDiv        |
| 3b       | E543-0720           | ChemDiv        |
| 3c-1     | E543-0394           | ChemDiv        |
| 3c-2     | E543-0720           | ChemDiv        |
| 3c-3     | E543-0443           | ChemDiv        |
| 3c-4     | E543-0198           | ChemDiv        |
| 3d       | E543-0001           | ChemDiv        |

**Figure S13. Lead compounds and their analogues used for structure-activity relationship (SAR) studies (related to STAR\* methods).** List of the vendor ID's and source libraries of the lead compounds (compounds 1-3) and their analogs.
